# Supplementary material
Source: publisher site journal article supplement (https://www.dovepress.com/article/608480)
Supplement: Supplementary file 1 [file 608480%20Supplementary%20Materials_1.docx]

**Supplementary Materials**

# Supplementary File 1. Database-specific search strategies

## PubMed

#1 "Osteoarthritis, Knee"[Mesh] OR ("Knee Osteoarthritides"[tiab] OR "Knee Osteoarthritis"[tiab] OR "Osteoarthritis of Knee"[tiab] OR "Osteoarthritis of the Knee"[tiab])
#2 "Complementary Therapies"[Mesh] OR ("Complementary Therapy"[tiab] OR "Alternative Medicine"[tiab] OR "Complementary Medicine"[tiab] OR "Alternative Therapies"[tiab] OR acupuncture[tiab] OR moxibustion[tiab] OR Tuina[tiab] OR massage[tiab] OR yoga[tiab] OR "Tai Chi"[tiab] OR Baduanjin[tiab] OR "manual therapy"[tiab] OR "mind-body"[tiab] OR "transcutaneous electrical nerve stimulation"[tiab] OR TENS[tiab])
#3 "randomized controlled trial"[Publication Type] OR randomized[Title/Abstract] OR randomised[Title/Abstract] OR placebo[Title/Abstract] OR sham[Title/Abstract]
#4 #1 AND #2 AND #3

## Embase

('knee osteoarthritis'/exp OR 'knee osteoarthritis':ti,ab OR 'osteoarthritis of knee':ti,ab) AND ('complementary therapy'/exp OR 'alternative medicine'/exp OR complementary:ti,ab OR alternative:ti,ab OR acupuncture:ti,ab OR moxibustion:ti,ab OR tuina:ti,ab OR massage:ti,ab OR yoga:ti,ab OR 'tai chi':ti,ab OR baduanjin:ti,ab OR 'manual therapy':ti,ab OR 'mind body':ti,ab OR tens:ti,ab OR 'transcutaneous electrical nerve stimulation':ti,ab) AND ('randomized controlled trial'/exp OR random*:ti,ab OR placebo:ti,ab OR sham:ti,ab)

## Cochrane Library

("knee osteoarthritis" OR "osteoarthritis of knee" OR "osteoarthritis of the knee") AND ("complementary therapy" OR "alternative medicine" OR acupuncture OR moxibustion OR Tuina OR massage OR yoga OR "Tai Chi" OR Baduanjin OR "manual therapy" OR "mind-body" OR TENS OR "transcutaneous electrical nerve stimulation")

## Web of Science

TS=("knee osteoarthritis" OR "osteoarthritis of knee" OR "osteoarthritis of the knee") AND TS=("complementary therapy" OR "alternative medicine" OR "complementary medicine" OR acupuncture OR moxibustion OR Tuina OR massage OR yoga OR "Tai Chi" OR Baduanjin OR "manual therapy" OR "mind-body" OR TENS OR "transcutaneous electrical nerve stimulation") AND TS=(random* OR placebo OR sham)

# Supplementary File 2. Data charting form

1. First author

2. Publication year

3. Country/region

4. Study setting

5. Participant eligibility/KOA diagnostic criteria

6. Sample size by group

7. Age/sex or key population features

8. Intervention category

9. Intervention components

10. Intervention dose, frequency, and duration

11. Provider background

12. Comparator type and description

13. Follow-up/assessment time points

14. Primary and secondary outcome domains

15. Safety/adverse-event reporting

16. Blinding/sham-control status

17. Allocation concealment reporting

18. Attrition/dropout information

19. Notes on co-interventions or pharmacological comparators

# Supplementary Table S1. Design-characteristic summary of included RCTs

Note: This supplementary table records, for each included trial, the sample size, blinding or sham-control status, comparator type, and follow-up or assessment duration. Abbreviations: RCT, randomized controlled trial; NR, not reported.

| Study | Sample size | Blinding/sham-control signal | Comparator type | Follow-up/assessment duration |
| --- | --- | --- | --- | --- |
| J.J.Cherian8 | 33/37 | No sham; usual/standard-care comparator | Usual/standard care | Duration: 3 months. Assessments: baseline, 3 months, long-term follow-up endpoint (mean 19 months). |
| Wang C9 | 106/98 | Blinding not clearly reported | Active non-pharmacological or other comparator | Duration: 12 weeks. Assessments: baseline, week 12, week 24, week 52. |
| Elbadawy MA10 | 30/30 | Blinding not clearly reported | Active non-pharmacological or other comparator | Duration: 10 weeks. Assessments: baseline, week 10, 6 months post-treatment. |
| Hausmann LRM11 | 21/21 | Blinding not clearly reported | Active non-pharmacological or other comparator | Duration: 6 weeks. Assessments: baseline, 1, 3, and 6 months post-intervention. |
| Park J12 | 63/49 | Blinding not clearly reported | Active non-pharmacological or other comparator | Duration: 8 weeks (2×/week, 45 min). Assessments: baseline, week 4, week 8, and 1 & 3 months post-intervention. |
| Altmış H13 | 20/20/20 | Sham/placebo or blinding control reported | Sham/placebo comparator | Duration: Single session. Assessments: pre- and post-intervention. |
| Innes KE14 | 9/11 | Blinding not clearly reported | Active non-pharmacological or other comparator | Duration: 8 weeks (2×/day, 15-20 min). Assessments: baseline and end of intervention. |
| Kong J15 | 19/18/17 | No sham; usual/standard-care comparator | Usual/standard care | Duration: 8 weeks. Assessments: baseline, mid-treatment (after 6th session), endpoint (after 10th session), plus 2 fMRI scans. |
| Lin LL16 | 21/21 | Sham/placebo or blinding control reported | Sham/placebo comparator | Duration: 8 weeks (3×/week, 20 min). Assessments: baseline, week 8, week 16, week 26. |
| Wang P17 | 32/31 | Blinding not clearly reported | Active non-pharmacological or other comparator | Duration: 3 weeks (1×/week). Assessments: pre-treatment, week 2, week 4. |
| Lv ZT18 | 145/72/75 | Sham/placebo or blinding control reported | Sham/placebo comparator | Duration: 2 weeks (5×/week, 30 min). Assessments: baseline, end of week 1, end of week 2. |
| Perlman A19 | 74/73/75 | No sham; usual/standard-care comparator | Usual/standard care | Duration: 8 weeks (1×/week). Assessments: baseline, week 8, 16, 24, 36, 52. |
| Chen H20 | 89/72 | No sham; usual/standard-care comparator | Usual/standard care | Duration: 24 weeks. Assessments: baseline, week 12, week 24. |
| Wang,Q21 | 30/30 | No sham; pharmacological active comparator/background | Pharmacological comparator/background | Duration: 4 weeks (3×/week). Assessments: pre-treatment, post-treatment, 3-month follow-up. |
| Wang TQ22 | 30/30 | Sham/placebo or blinding control reported | Sham/placebo comparator | Duration: 8 weeks (3×/week). Assessments: baseline, week 4, 8, 12, 16. |
| Ye J23 | 28/28 | No sham; usual/standard-care comparator | Usual/standard care | Duration: 12 weeks (3×/week). Assessments: baseline, week 8, week 12. |
| Zhu J24 | 39/44 | No sham; pharmacological active comparator/background | Pharmacological comparator/background | Duration: 3 weeks. Assessments: baseline, week 3, 3 months. |
| Alinaghizadeh M25 | 36/36 | Sham/placebo or blinding control reported | Sham/placebo comparator | Duration: 5 days (2×/day). Assessments: baseline, end of day 1, end of day 5, 10 days post-intervention. |
| Bunsanong T26 | 20/20 | No sham; usual/standard-care comparator | Usual/standard care | Duration: 4 weeks (2×/week). Assessments: baseline, immediately post-intervention, 4 weeks post-intervention. |
| Guo JM27 | 351/345 | Blinding not clearly reported | Active non-pharmacological or other comparator | Duration: 4 weeks. Assessments: baseline, week 2, week 4, and 1 & 3 months post-treatment. |
| Lam WC28 | 39/36 | Sham/placebo or blinding control reported | Sham/placebo comparator | Duration: 4 weeks (10 sessions). Assessments: baseline, after each session, week 2, 4, 6, and 10. |
| Maheu E.29 | 52/47 | No sham; pharmacological active comparator/background | Pharmacological comparator/background | Duration: 3 months. Assessments: baseline, month 1, month 3 (wearable TENS extended to month 6). |
| Tu JF30 | 151/145/146 | Sham/placebo or blinding control reported | Sham/placebo comparator | Duration: 8 weeks (3×/week). Assessments: NR. |
| Zacaron KAM31 | 35/36/36 | Blinding not clearly reported | Active non-pharmacological or other comparator | Duration: 8 weeks. Assessments: baseline, week 8, week 16. |
| Bennell KL32 | 107/105 | Blinding not clearly reported | Active non-pharmacological or other comparator | Duration: 12 weeks (3×/week). Assessments: baseline, week 12, week 24. |
| Dasa V33 | 42/22 | Sham/placebo or blinding control reported | Sham/placebo comparator | Duration: 14 weeks (5 days/week; 2×/day; 20 min/session). Assessments: baseline and week 14. |
| Sax OC34 | 106/50 | Sham/placebo or blinding control reported | Sham/placebo comparator | Duration: 12 weeks (5 days/week; 2×/day). Assessments: baseline, week 4, 8, 12. |
| Woo SH35 | 20/20 | Blinding not clearly reported | Active non-pharmacological or other comparator | Duration: 6 weeks. Assessments: baseline, week 3, week 6, week 10. |
| Artuç ŞE36 | 20/20/20/20 | Sham/placebo or blinding control reported | Sham/placebo comparator | Duration: 2 weeks (5 days/week). Assessments: baseline, week 2, 3-month follow-up. |
| Deng Y37 | 32/33 | No sham; pharmacological active comparator/background | Pharmacological comparator/background | Duration: 2 weeks. Assessments: baseline and week 2. |
| Zheng A38 | 35/34/35 | Blinding not clearly reported | Active non-pharmacological or other comparator | Duration: 4 weeks (6 sessions/week). Assessments: baseline, week 4, week 8. |
| Zhou J39 | 36/36/36/36/36/41 | Sham/placebo or blinding control reported | Pharmacological comparator/background | Duration: 2 weeks. Assessments: baseline and week 2. |
| Gillcrist RL40 | 31 | Blinding not clearly reported | Active non-pharmacological or other comparator | Duration: 32 weeks. Assessments: electronic questionnaires every 2 weeks for 32 weeks. |
| Döner Şİ41 | 20/20/20 | Blinding not clearly reported | Active non-pharmacological or other comparator | Duration: 4 weeks. Assessments: baseline and week 4. |
| Mou J42 | 30/30 | Blinding not clearly reported | Active non-pharmacological or other comparator | Duration: 6 weeks (3×/week, 30 min). Assessments: baseline, post-treatment, 3-month follow-up. |
| Abafita BJ43 | 58/59 | Blinding not clearly reported | Active non-pharmacological or other comparator | Duration: 24 weeks. Assessments: baseline, weeks 4, 8, 12, 16, 20, 24. |
| Agost-González A44 | 18/20 | Sham/placebo or blinding control reported | Sham/placebo comparator | Duration: 3 weeks. Assessments: baseline, post-treatment, 3 and 6 months post-treatment. |
| Akdeniz G45 | 24/24 | Blinding not clearly reported | Active non-pharmacological or other comparator | Duration: 10 days (1×/day, 45 min). Assessments: pre- and post-intervention. |
| Atan T46 | 10/10/10 | No sham; usual/standard-care comparator | Usual/standard care | Duration: 8 weeks (3×/week, 60 min). Assessments: baseline, week 4, week 8. |
| Awan S47 | 30/30 | Blinding not clearly reported | Active non-pharmacological or other comparator | Duration: 12 weeks (3×/week). Assessments: baseline and week 12. |
| Dantas AT48 | 12/12/12 | Sham/placebo or blinding control reported | Sham/placebo comparator | Duration: Single session. Assessments: baseline, immediately post-treatment, and 5, 15, 30 days post-treatment. |
| Godziuk K49 | 25/25 | Blinding not clearly reported | Active non-pharmacological or other comparator | Duration: 3 months. Assessments: baseline, 3 months, 9 months. |
| Guo X50 | 30/30 | Blinding not clearly reported | Active non-pharmacological or other comparator | Duration: 4 weeks (3×/week). Assessments: baseline, immediately post-treatment, 1 week post-treatment. |
| Hanley AW51 | 41/41/41/41 | Sham/placebo or blinding control reported | Sham/placebo comparator | Duration: 4 weeks (1×/week, 30 min). Assessments: baseline, 1 month, 2 months. |
| Katz JN52 | 219/220/222/218 | Sham/placebo or blinding control reported | Sham/placebo comparator | Duration: 3 months. Assessments: baseline, 3, 6, 12 months. |
| Kızkın ZY53 | 23/23 | No sham; usual/standard-care comparator | Usual/standard care | Duration: 8 weeks (3×/week). Assessments: NR. |
| Ma P54 | 70/70 | Blinding not clearly reported | Active non-pharmacological or other comparator | Duration: 3 weeks (8 sessions; 20 min/session). Assessments: baseline, week 4, week 8, week 16. |
| Momen Arani Z55 | 40/40/40 | Blinding not clearly reported | Active non-pharmacological or other comparator | Duration: 4 weeks (2×/week; 15 min). Assessments: baseline, week 4, 1-month follow-up. |
| Ng HP56 | 50/51 | No sham; usual/standard-care comparator | Usual/standard care | Duration: 6 weeks (2×/week, 30 min). Assessments: baseline, week 6, week 12, week 24. |
| Sun J57 | 60/60/60/60/60/60 | Sham/placebo or blinding control reported | Pharmacological comparator/background | Duration: 4 weeks. Assessments: NR. |
| Tsai AWW58 | 30/30/30/30 | Sham/placebo or blinding control reported | Sham/placebo comparator | Duration: 5 weeks (2×/week, 30 min). Assessments: baseline and end of treatment. |
| Wei XY59 | 27/25/22 | Sham/placebo or blinding control reported | Sham/placebo comparator | Duration: 4 weeks (3×/week). Assessments: baseline and week 4. |
| Bakir E60 | 30/30/30/30/30 | Sham/placebo or blinding control reported | Sham/placebo comparator | Duration: 6 weeks (1×/week, 30 min). Assessments: pre- and post-intervention. |
